# Supplementary material for: Risk of Community-Acquired Pneumonia with Outpatient Proton-Pump Inhibitor Therapy: A Systematic Review and Meta-Analysis
Source: PubMed Central journal article supplement (PMC4456166; doi:10.1371/journal.pone.0128004), 2015-06-04
Supplement: pone.0128004.s002.pdf [file pone.0128004.s002.pdf]

**S5 Figure. Risk of Bias Assessments for Observational Studies**

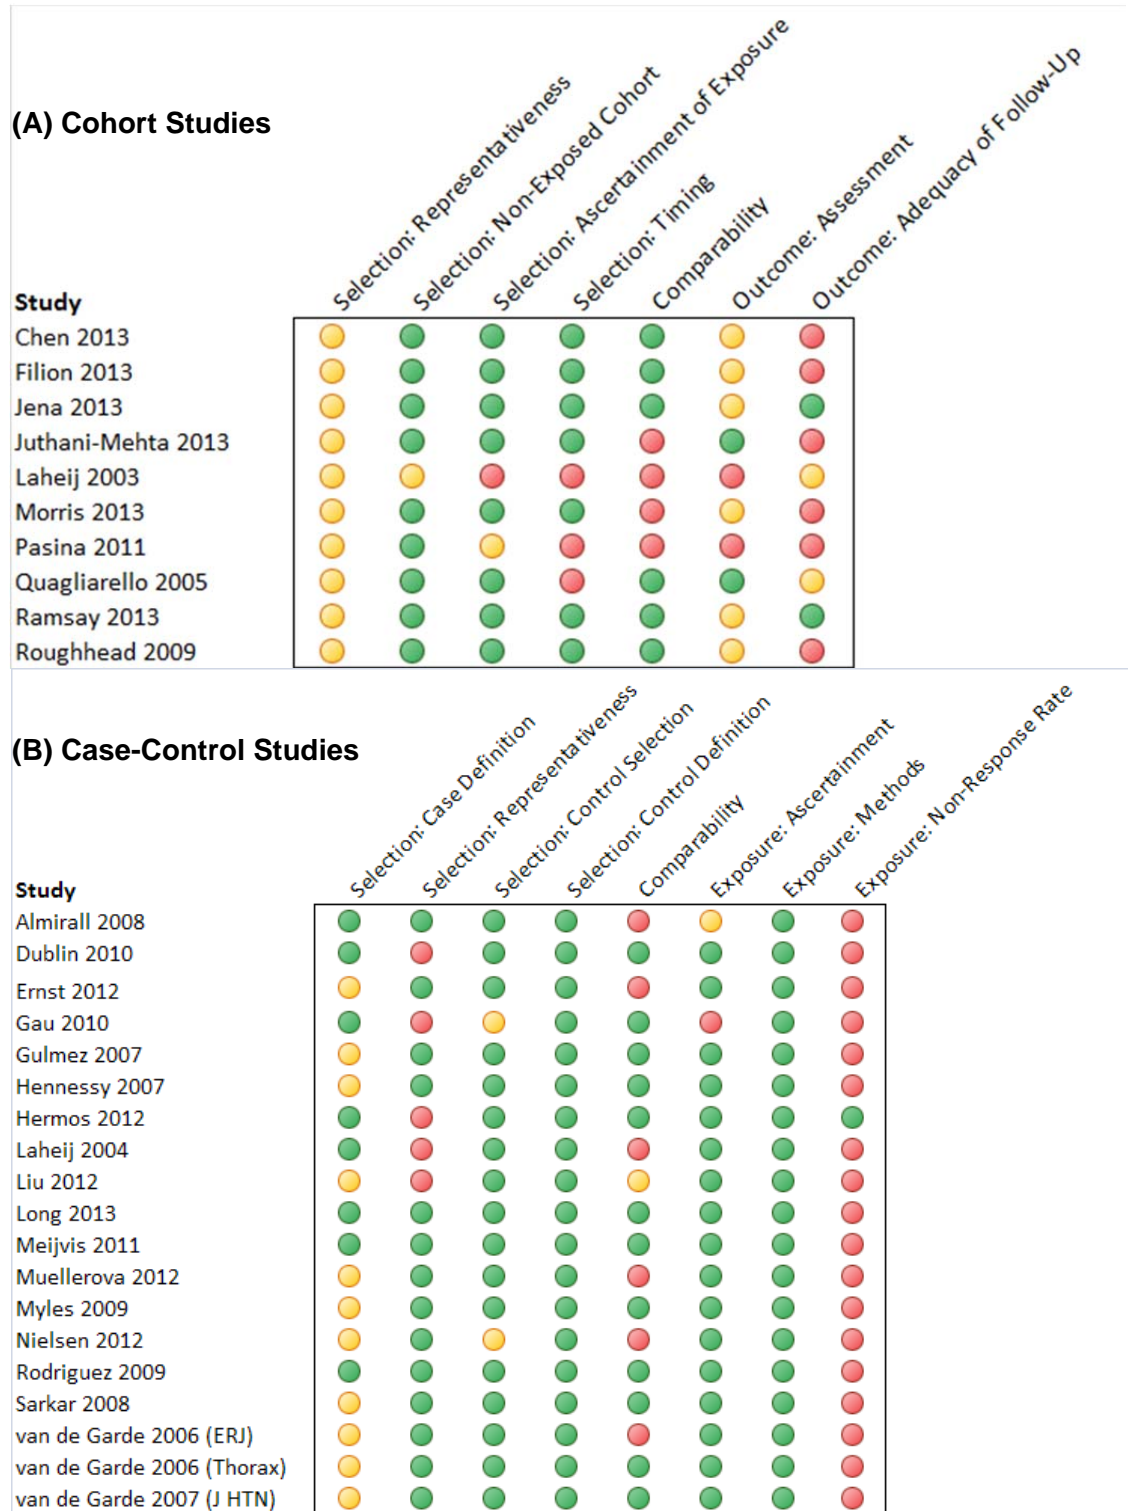

Risk of bias was assessed using a modified Newcastle-Ottawa Scale as outlined in Online Supplemental Table 3. The risk associated with each criterion on the scale corresponds to a circle in this figure. Low risk is represented by a green circle, medium risk yellow, and high risk red.
