# Supplementary material for: Risk of Community-Acquired Pneumonia with Outpatient Proton-Pump Inhibitor Therapy: A Systematic Review and Meta-Analysis
Source: PubMed Central journal article supplement (PMC4456166; doi:10.1371/journal.pone.0128004), 2015-06-04

**S7 Figure. Forest Plot for Primary Analysis, Stratified by Study Design.**

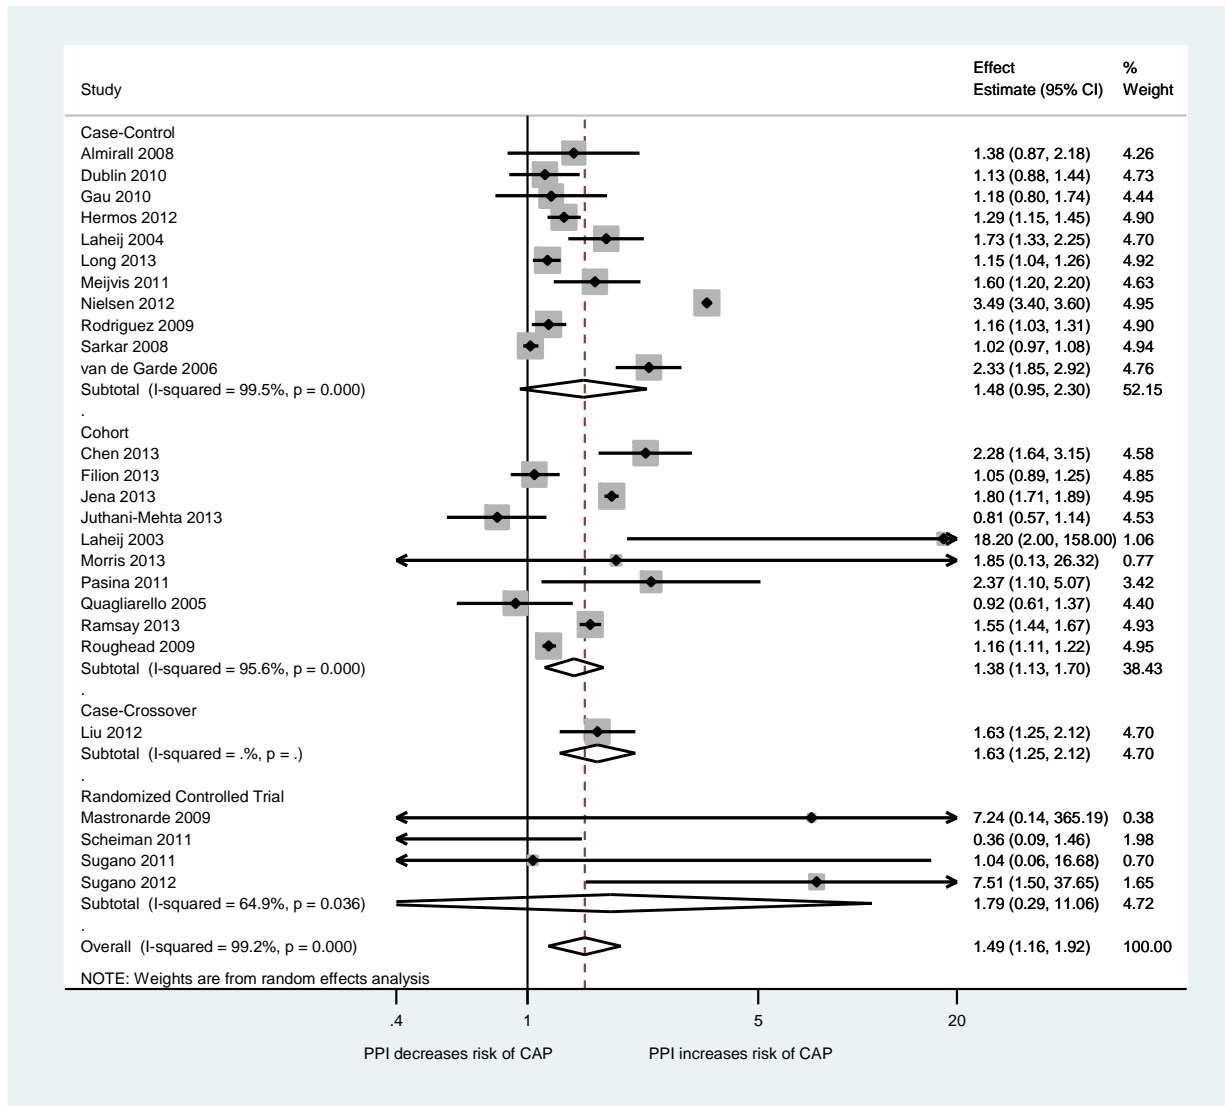

Supplement: pone.0128004.s004.pdf [file pone.0128004.s004.pdf]
