# Supplementary material for: Risk of Community-Acquired Pneumonia with Outpatient Proton-Pump Inhibitor Therapy: A Systematic Review and Meta-Analysis
Source: PubMed Central journal article supplement (PMC4456166; doi:10.1371/journal.pone.0128004), 2015-06-04
Supplement: pone.0128004.s007.pdf [file pone.0128004.s007.pdf]

**S3 Table. Modified Newcastle-Ottawa Scale for Risk of Bias Assessment**

| Case Control Studies                                                                                                                                                                                                                                                                                                                                                                                                                                                                                                                                                                                                                                                                                                                                                                                                                                                             | Cohort Studies                                                                                                                                                                                                                                                                                                                                                                                                                                                                                                                                                                                                                                                                                                                                                                                                                                                                                                                                                                                                                                                                                                                            |
|----------------------------------------------------------------------------------------------------------------------------------------------------------------------------------------------------------------------------------------------------------------------------------------------------------------------------------------------------------------------------------------------------------------------------------------------------------------------------------------------------------------------------------------------------------------------------------------------------------------------------------------------------------------------------------------------------------------------------------------------------------------------------------------------------------------------------------------------------------------------------------|-------------------------------------------------------------------------------------------------------------------------------------------------------------------------------------------------------------------------------------------------------------------------------------------------------------------------------------------------------------------------------------------------------------------------------------------------------------------------------------------------------------------------------------------------------------------------------------------------------------------------------------------------------------------------------------------------------------------------------------------------------------------------------------------------------------------------------------------------------------------------------------------------------------------------------------------------------------------------------------------------------------------------------------------------------------------------------------------------------------------------------------------|
| <p><b>Selection</b></p> <ol style="list-style-type: none"> <li>1) <u>Is the case definition adequate?</u> <ol style="list-style-type: none"> <li>a) yes, with independent validation</li> <li>b) yes, e.g., record linkage or based on self-reports</li> <li>c) no description</li> </ol> </li> <li>2) <u>Representativeness of the cases</u> <ol style="list-style-type: none"> <li>a) consecutive or obviously representative series of cases</li> <li>b) potential for selection biases or not stated</li> </ol> </li> <li>3) <u>Selection of Controls</u> <ol style="list-style-type: none"> <li>a) community controls</li> <li>b) hospital controls</li> <li>c) no description</li> </ol> </li> <li>4) <u>Definition of Controls</u> <ol style="list-style-type: none"> <li>a) no history of disease (endpoint)</li> <li>b) no description of source</li> </ol> </li> </ol> | <p><b>Selection</b></p> <ol style="list-style-type: none"> <li>1) <u>Representativeness of the exposed cohort</u> <ol style="list-style-type: none"> <li>a) truly representative of the average adult in the community</li> <li>b) somewhat representative of the average adult in the community</li> <li>c) selected group of users e.g. ,nurses, volunteers</li> <li>d) no description of the derivation of the cohort</li> </ol> </li> <li>2) <u>Selection of the non-exposed cohort</u> <ol style="list-style-type: none"> <li>a) drawn from the same community as the exposed cohort</li> <li>b) drawn from a different source</li> <li>c) no description of the derivation of the non-exposed cohort</li> </ol> </li> <li>3) <u>Ascertainment of exposure</u> <ol style="list-style-type: none"> <li>a) secure record (e.g., surgical records)</li> <li>b) structured interview</li> <li>c) written self-report</li> <li>d) no description</li> </ol> </li> <li>4) <u>Demonstration that outcome of interest was not present at study start</u> <ol style="list-style-type: none"> <li>a) yes</li> <li>b) no</li> </ol> </li> </ol> |
| <p><b>Comparability</b></p> <ol style="list-style-type: none"> <li>1) <u>Comparability of cases and controls on the basis of the design or analysis</u> <ol style="list-style-type: none"> <li>a) study controls for age</li> <li>b) study controls for any additional factor</li> </ol> </li> </ol>                                                                                                                                                                                                                                                                                                                                                                                                                                                                                                                                                                             | <p><b>Comparability</b></p> <ol style="list-style-type: none"> <li>1) <u>Comparability of cohorts on the basis of the design or analysis</u> <ol style="list-style-type: none"> <li>a) study controls for age</li> <li>b) study controls for any additional factor</li> </ol> </li> </ol>                                                                                                                                                                                                                                                                                                                                                                                                                                                                                                                                                                                                                                                                                                                                                                                                                                                 |
| <p><b>Exposure</b></p> <ol style="list-style-type: none"> <li>1) <u>Ascertainment of exposure</u> <ol style="list-style-type: none"> <li>a) secure record (e.g., pharmacy records)</li> <li>b) structured interview where blind to case/control status</li> <li>c) interview not blinded to case/control status</li> <li>d) written self-report or medical record only</li> <li>e) no description</li> </ol> </li> <li>2) <u>Same method of ascertainment for cases and controls</u> <ol style="list-style-type: none"> <li>a) yes</li> <li>b) no</li> </ol> </li> <li>3) <u>Non-Response rate</u> <ol style="list-style-type: none"> <li>a) same rate for both groups</li> <li>b) non respondents described</li> <li>c) rate different and no designation</li> </ol> </li> </ol>                                                                                                | <p><b>Outcome</b></p> <ol style="list-style-type: none"> <li>1) <u>Assessment of outcome</u> <ol style="list-style-type: none"> <li>a) independent blind assessment</li> <li>b) record linkage</li> <li>c) self-report</li> <li>d) no description</li> </ol> </li> <li>2) <u>Adequacy of follow up of cohorts</u> <ol style="list-style-type: none"> <li>a) complete follow up - all subjects accounted for</li> <li>b) subjects lost to follow up unlikely to introduce bias: i.e., &lt;10% small number lost, or description provided of those lost</li> <li>c) follow-up rate &lt; 90% and no description of those lost</li> <li>d) no statement</li> </ol> </li> </ol>                                                                                                                                                                                                                                                                                                                                                                                                                                                                |
