# Supplementary material for: Risk of Community-Acquired Pneumonia with Outpatient Proton-Pump Inhibitor Therapy: A Systematic Review and Meta-Analysis
Source: PubMed Central journal article supplement (PMC4456166; doi:10.1371/journal.pone.0128004), 2015-06-04
Supplement: pone.0128004.s008.pdf [file pone.0128004.s008.pdf]

**S4 Table. Patient and Study Characteristics of the 33 Studies under Systematic Review**

| Author Year   | Age, years                                                                                                        | CAP Definition                                                                                                | Comorbidities                                                                                                                                                                                                                                                           | Comparison                                                                                                                                                        | Additional Covariates                                                                                                                                                                                                                                                                                                         | Ref. |
|---------------|-------------------------------------------------------------------------------------------------------------------|---------------------------------------------------------------------------------------------------------------|-------------------------------------------------------------------------------------------------------------------------------------------------------------------------------------------------------------------------------------------------------------------------|-------------------------------------------------------------------------------------------------------------------------------------------------------------------|-------------------------------------------------------------------------------------------------------------------------------------------------------------------------------------------------------------------------------------------------------------------------------------------------------------------------------|------|
| Almirall 2008 | Male cases: 58.6 (19.8)<br>Female cases: 54.6 (20.7)<br>Male controls: 58.9 (19.6)<br>Female controls 54.6 (20.6) | Medical record review with prescription of antibiotics and new radiological findings suggestive of infiltrate | Asthma, CAD, CHF, COPD, CVA, Dementia, Dental dysaesthesia, Dental prosthesis, DM, Epilepsy, GERD, Heart valve disease, HIV, Liver disease, Nonactive pulmonary tuberculosis, Parkinson's disease, Psychiatric disorders, Renal failure, Visit to dentist in last month | Matched 1:1 on age, sex, and primary care center using frequency matching to patients in same primary care center                                                 | None                                                                                                                                                                                                                                                                                                                          | 23   |
| Chen 2013     | Exposed: 63.3 (13.0)<br>Unexposed: 54.2 (18.3)                                                                    | Diagnostic codes (ICD-9)                                                                                      | Acute renal failure*, asthma*, CKD, COPD*, CVA*, DM*, ischemic heart disease*                                                                                                                                                                                           | Unexposed cohort members                                                                                                                                          | Age, sex                                                                                                                                                                                                                                                                                                                      | 24   |
| Dublin 2010   | Median: 77 (IQR: 71-82)                                                                                           | Diagnostic codes (ICD-9), confirmed by review of radiology and hospital records                               | Alcoholism*, Asthma*, CHF*, COPD*, Coronary revascularization*, CVA*, Dementia*, DM, Dyspepsia, Frailty*, Functional impairment, GERD, MI*, Need for home oxygen*, Peptic ulcer, Swallowing disorder leading to aspiration*, Tobacco use*                               | Matched 1:2 on age, sex, and calendar year using incidence density sampling                                                                                       | COPD hospitalizations, FEV1, CHF hospitalization, ejection fraction, other heart disease, pneumococcal or influenza vaccination, number of outpatient visits, need for assistance with ambulation or bathing<br><u>Medications</u> : inhaled bronchodilators, inhaled corticosteroids, oral corticosteroids, furosemide, H2RA | 25   |
| Ernst 2012    | Cases: 79.2 (8.0)<br>Controls: 78.6 (7.8)                                                                         | Diagnostic codes (ICD-10)                                                                                     | Asthma, Anemia, Bipolar disorder, CAD, Cancer, Cardiac valve condition, CHF, COPD, CVA, Dementia, Depression, Epilepsy, Hypertension, Motor neuron disease, Peripheral edema, Psychosis, Renal failure, Rhythm irregularity                                             | Matched 1:up to 10 on age, indication for anti-parkinsonian drug, prevalent or new user at cohort entry, and year of cohort entry using patients in same database | None                                                                                                                                                                                                                                                                                                                          | 26   |

| Author Year   | Age, years                                         | CAP Definition                                     | Comorbidities                                                                                                                                                                                                                                                                    | Comparison                                                                                                       | Additional Covariates                                                                                                                                                                                                                                                                                                                                                                                                        | Ref. |
|---------------|----------------------------------------------------|----------------------------------------------------|----------------------------------------------------------------------------------------------------------------------------------------------------------------------------------------------------------------------------------------------------------------------------------|------------------------------------------------------------------------------------------------------------------|------------------------------------------------------------------------------------------------------------------------------------------------------------------------------------------------------------------------------------------------------------------------------------------------------------------------------------------------------------------------------------------------------------------------------|------|
| Filion 2013   | Exposed: 65-74 (30.5%)<br>Unexposed: 40-54 (41.6%) | Diagnostic codes (ICD-10)                          | Asthma*, COPD*, Bronchiectasis*, DM*, Excessive alcohol use*, Tobacco use*                                                                                                                                                                                                       | Unexposed cohort members                                                                                         | index year, income category, hospitalization in previous year, use of >4 medication in previous year, >4 physician visits in the previous year, BMI, up to 500 additional confounders empirically included in propensity score<br><u>Medications</u> : immunosuppressive agents, inhaled bronchodilators, inhaled corticosteroids, non-topical antibiotics, non-topical corticosteroids, influenza or pneumococcal vaccines. | 27   |
| Gau 2010      | Cases: 80.3 (8.5)<br>Controls: 79.8 (8.1)          | Discharge diagnosis with radiographic confirmation | Atrial fibrillation, CAD*, CHF*, Cognitive impairment, COPD*, CVA, Depression, DM, GERD, Prior pneumonia, Psychiatric illness                                                                                                                                                    | Hospitalized controls without pneumonia or COPD exacerbation                                                     | Age, sex, smoking status, serum albumin<br><u>Medications</u> : atypical antipsychotics, beta2-agonists, anti-cholinergics, inhaled corticosteroids, iron, narcotics, NSAIDs, antibiotics                                                                                                                                                                                                                                    | 28   |
| Gulmez 2007   | Cases: 55.5 (31.2)<br>Controls: 56.5 (29.5)        | Diagnostic codes (ICD-8 & ICD-10)                  | COPD*, Peptic ulcer*, Heart failure*, Ischemic heart disease*, DM*, CVA*, Renal failure*, Hepatic cirrhosis*, Alcohol-related* diagnosis, drug use diagnosis, psychiatric disorder                                                                                               | Matched 1:4 on age in 10-year band, and sex using randomly selected community controls                           | Previous discharge diagnosis of CAP, ischemic heart disease, liver cirrhosis, renal failure<br><u>Medications</u> : systemic and inhaled corticosteroids, bronchodilators, NSAIDs, anticholinergic agents, antipsychotic agents                                                                                                                                                                                              | 29   |
| Hennessy 2007 | Cases: 81 (74-86)<br>Controls: 75 (70-81)          | Diagnostic codes (Read)                            | Alcohol use, Anterior horn motor neuron disease, Anxiety, Bipolar disorder, COPD, CVA, Depression, Dysphagia, Herpetic neuralgia/herpes zoster, Insomnia, Parkinson's Disease, Poor nutritional status, Schizophrenic disorders, Senile dementia, Suicidal ideation, Tobacco use | Matched 1:4 on general practitioner practice group using incidence density sampling of patients in same database | Age, sex, calendar year<br><u>Medications</u> : current use of antidepressant drug                                                                                                                                                                                                                                                                                                                                           | 30   |

| Author Year        | Age, years                                   | CAP Definition                                                                                                 | Comorbidities                                                                                                                                                                                                                                                                 | Comparison                                                                                                                                | Additional Covariates                                                                                                                                                                                                                       | Ref. |
|--------------------|----------------------------------------------|----------------------------------------------------------------------------------------------------------------|-------------------------------------------------------------------------------------------------------------------------------------------------------------------------------------------------------------------------------------------------------------------------------|-------------------------------------------------------------------------------------------------------------------------------------------|---------------------------------------------------------------------------------------------------------------------------------------------------------------------------------------------------------------------------------------------|------|
| Hermos 2012        | 65.8 (12.2)                                  | Diagnostic code (ICD-9) and pharmacy record of respiratory antibiotic prescription                             | Alcohol/drug dependence or abuse*, CHF*, Chronic liver disease*, CKD*, COPD*, Dementia*, DM*, GERD*, H. pylori, Ischemic heart disease*, Lung cancer*, Non-skin/non-lung cancer*, Peptic ulcer diseases*, Reflux esophagitis*                                                 | Matched 1:10 on age, and duration under observation using risk set sampling of patients in same database. Controls were former PPI users. | Sex, time period of CAP diagnosis<br><u>Medications</u> : H2RA, systemic corticosteroid, immunomodulator/immunosuppressant, tranquilizer/sedative, or antipsychotic agents active use at baseline; antibiotic use ≤90 days before baseline. | 31   |
| Jena 2013          | Exposed: 66.5 (0.1)<br>Unexposed: 66.0 (0.1) | Diagnostic codes (ICD-9)                                                                                       | Asthma/COPD*, cancer*, chest pain, chronic renal insufficiency*, congestive heart failure*, coronary artery disease*, deep vein thrombosis, diabetes*, hyperlipidemia*, hypertension*, osteoarthritis, rheumatoid arthritis, skin infection, stroke*, urinary tract infection | Controls never exposed to PPI in the same insurance claims database                                                                       | Age, geographic location, income, marital status                                                                                                                                                                                            | 32   |
| Juthani-Mehta 2013 | Cases: 75.2 (2.8)<br>Controls: 74.7 (2.9)    | Medical record review of radiography, respiratory symptoms, physical examination, and diagnostic codes (ICD-9) | Cancer, CAD, chronic lung disease, CVA, depression, DM, hypertension, tobacco use                                                                                                                                                                                             | Unexposed cohort members                                                                                                                  | None                                                                                                                                                                                                                                        | 33   |
| Laheij 2003        | Exposed: >60 (49%)<br>Unexposed: >60 (37%)   | Patient report                                                                                                 | Asthma/COPD, Current tobacco or alcohol use, Foreign country visit, Obesity                                                                                                                                                                                                   | Unexposed cohort members                                                                                                                  | None                                                                                                                                                                                                                                        | 34   |
| Laheij 2004        | Cases: >60 (58.1%)<br>Controls: >60 (58.1%)  | Medical record review of radiography, microbiology or respiratory symptoms                                     | COPD, DM*, Heart failure*, Indication for antacids (GERD, cancer, peptic ulcer disease, functional dyspepsia), Lung cancer, Stomach cancer                                                                                                                                    | Matched 1:10 on sex, birth year, and index date using Integrated Primary Care Information project enrollees                               | Respiratory illness<br><u>Medications</u> : antibiotics and immunosuppressants                                                                                                                                                              | 35   |

| Author Year      | Age, years                                  | CAP Definition                                                                                                   | Comorbidities                                                                                                                                         | Comparison                                                                                                                                                                                 | Additional Covariates                                                                                            | Ref. |
|------------------|---------------------------------------------|------------------------------------------------------------------------------------------------------------------|-------------------------------------------------------------------------------------------------------------------------------------------------------|--------------------------------------------------------------------------------------------------------------------------------------------------------------------------------------------|------------------------------------------------------------------------------------------------------------------|------|
| Liu 2012         | 75.2 (10.5)                                 | Diagnostic codes (ICD-9)                                                                                         | Respiratory diseases, DM                                                                                                                              | The drug exposure immediately prior to the admission for pneumonia ("case" period) was compared to past drug exposure for the same patient ("control" periods)                             | Number of outpatient visits<br><u>Medications</u> : statins, H2RA, ACE inhibitors, angiotensin receptor blockers | 36   |
| Long 2013        | Median 47 (IQR: 35-55)                      | Diagnostic codes (ICD-9) with antibiotic prescription or hospital admission                                      | Cardiac*, COPD*, DM*, Inflammatory bowel disease (Crohn's or Ulcerative colitis)*, Liver disease*, Renal disease*, Rheumatologic disease*             | Matched 1:4 on age, gender, geographic region, type of inflammatory bowel disease, duration of follow-up, and index date using incidence density sampling of IBD patients in same database | Health-care utilization<br><u>Medications</u> : 5-ASAs, biologics, thiopurine, corticosteroids, narcotics        | 37   |
| Mastrorarde 2009 | 42 (13)                                     | Not reported                                                                                                     | Allergies that worsen asthma, Asthma, Eczema, Food allergies, GERD, Rhinitis, Sinusitis, Tobacco use                                                  | Patients in placebo arm of the trial                                                                                                                                                       | <u>Medications</u> : inhaled short-acting beta-agonist, oral or inhaled corticosteroids                          | 38   |
| Meijvis 2011     | Cases: 62 (18)<br>Controls: 62 (18)         | New infiltrate on a chest radiograph with at least two clinical or laboratory findings consistent with pneumonia | Asthma*, CHF*, COPD*, DM*, Renal failure*                                                                                                             | Matched 1:4 on birth year, sex, and index date using PHARMO Institute enrollees (research database)                                                                                        | PSI score<br><u>Medications</u> : Inhaled corticosteroids, anticholinergics, NSAIDS, oral corticosteroids        | 39   |
| Morris 2013      | Exposed: 55 (10.7)<br>Unexposed: 63 (14.0)  | Positive sputum culture with medical record review for clinical correlation                                      | DM, Kidney transplantation, Hypertension                                                                                                              | Unexposed cohort members                                                                                                                                                                   | None                                                                                                             | 40   |
| Muellerova 2012  | Cases: 75.1 (10.6)<br>Controls: 70.9 (10.8) | Diagnostic codes (Read)                                                                                          | Anxiety, Asthma, CHF, Connective tissue disorder; COPD, CVA, Dementia, Depression, DM, Lung cancer, MI, Peptic ulcer, PVD, Renal disease, Tobacco use | Matched 1:5 on length of follow-up using COPD patients ≥ 45 years old in the General Practice Research Database                                                                            | None                                                                                                             | 41   |

| Author Year       | Age, years                                                                                       | CAP Definition                                 | Comorbidities                                                                                                                                                                                                                                                                      | Comparison                                                                                                                                                               | Additional Covariates                                                                                                                                                                                                                                                                                                                                                                       | Ref. |
|-------------------|--------------------------------------------------------------------------------------------------|------------------------------------------------|------------------------------------------------------------------------------------------------------------------------------------------------------------------------------------------------------------------------------------------------------------------------------------|--------------------------------------------------------------------------------------------------------------------------------------------------------------------------|---------------------------------------------------------------------------------------------------------------------------------------------------------------------------------------------------------------------------------------------------------------------------------------------------------------------------------------------------------------------------------------------|------|
| Myles 2009        | Cases: >80 (32.5%)<br>Controls: >80 (32.8%)                                                      | Diagnostic codes (Read)                        | Chronic lung disease*, Ischemic heart disease*, Tobacco use*                                                                                                                                                                                                                       | Matched 1:6 on outpatient practice, sex, and age using The Health Improvement Network enrollees (THIN)                                                                   | Previous pneumonia, Charlson comorbidity index<br><u>Medications:</u> Diuretics, calcium channel blockers, antacids, steroids & nitrates                                                                                                                                                                                                                                                    | 42   |
| Nielsen 2012      | 15-39: 51,601 (7.3%)<br>40-64: 178,095 (25.1%)<br>65-79: 261,046 (36.8%)<br>80+: 218,398 (30.8%) | Diagnostic codes (ICD-8 & ICD-10)              | AIDS, Alcoholism-related disorders, Cancer, CHF, COPD, Connective tissue disease, CVA, Dementia, DM, Hemiplegia, Leukemia, Liver disease, Lymphoma, MI, Obesity, Peptic ulcer disease, Peripheral vascular disease, Renal disease, Surgical procedure within 90 days of index date | Matched ratio 1:10 on birth year, sex, index date, and place of residence using community controls selected by risk set sampling of Danish National Registry of Patients | None                                                                                                                                                                                                                                                                                                                                                                                        | 43   |
| Pasina 2011       | Exposed: 79.2 (7.7)<br>Unexposed: 79.2 (7.5)                                                     | Diagnostic codes (ICD-9)                       | Duodenal ulcer, Esophageal disease, Gastric ulcer, Gastritis, Gastrointestinal hemorrhage, Gastrojejunal ulcer, H. pylori infection, Peptic ulcer                                                                                                                                  | Unexposed cohort members                                                                                                                                                 | None                                                                                                                                                                                                                                                                                                                                                                                        | 44   |
| Quagliarello 2005 | 84.7                                                                                             | Compatible symptoms with radiographic findings | Cancer, CHF, COPD*, CVA, Dementia, Depression, DM, Liver disease, Renal disease                                                                                                                                                                                                    | Unexposed cohort members                                                                                                                                                 | Nursing home site, age, race, number of comorbidities, immobility, inadequate oral care, swallowing difficulty, lack of influenza vaccination, depression, feeding position <90 degrees from horizontal, active smoking<br><u>Medications:</u> sedating medications, ACE-I                                                                                                                  | 45   |
| Ramsay 2013       | 83 (80-86)                                                                                       | Diagnostic codes (ICD-10)                      | Not listed                                                                                                                                                                                                                                                                         | Unexposed cohort members                                                                                                                                                 | Age, gender, socioeconomic index of disadvantage for area of residence, number of co-morbidities, number of prescriptions, number of prescribers, number of pharmacies and number of occupational therapy visits and speech pathology services, season, residential aged-care status<br><u>Medications:</u> number of prescriptions, tiotropium, first concurrent use of ARB and furosemide | 46   |

| Author Year                | Age, years                                      | CAP Definition                    | Comorbidities                                                                                                                                                      | Comparison                                                                                                                                                   | Additional Covariates                                                                                                                                                                                                                                                       | Ref. |
|----------------------------|-------------------------------------------------|-----------------------------------|--------------------------------------------------------------------------------------------------------------------------------------------------------------------|--------------------------------------------------------------------------------------------------------------------------------------------------------------|-----------------------------------------------------------------------------------------------------------------------------------------------------------------------------------------------------------------------------------------------------------------------------|------|
| Rodriguez 2009             | 70-79 (32%)                                     | Diagnostic codes (Read)           | Anemia, Asthma, Cancer, Cerebrovascular disease, COPD, Depression, DM, Dyspepsia, GERD, Heart failure, Ischemic heart disease, MI, Peptic ulcer*, RA, Tobacco use* | Frequency-matched on sex, age, and month/year of index date using THIN enrollees                                                                             | Primary care doctor visits, referrals, hospitalizations, Charlson comorbidity index<br><u>Medications</u> : oral steroids, antibiotics, H2RA                                                                                                                                | 47   |
| Roughead 2009              | 79.4 (5.2)                                      | Diagnostic codes (ICD-10)         | CHF*, COPD* (via medication proxies)                                                                                                                               | Unexposed cohort members                                                                                                                                     | Age, sex, socioeconomic index of disadvantage, season, residential age-cared status, occupational therapy visits, RxRisk-V score, speech pathology services<br><u>Medications</u> : number of prescriptions, prescribers, pharmacies                                        | 48   |
| Sarkar 2008                | Cases: 73.5 (17.6)<br>Controls: 49.5 (18.3)     | Diagnostic codes (Read or Oxford) | Alcoholism*, Cancer*, Cirrhosis*, CHF*, COPD*, CVA, Dementia*, DM*, Dysphagia, MI*, Renal failure*                                                                 | Matched 1:10 using incidence density sampling of General Practice Research Database enrollees                                                                | Age, sex, current smoking status, number of general practice visits, total number of hospitalizations, asthma<br><u>Medications</u> : H2RAs, anxiolytics, antidepressants, antiparkinson drugs, antipsychotics, barbiturates, opiates, corticosteroids, antibiotics, NSAIDs | 49   |
| Scheiman 2011              | Exposed: >70 (36.3%)<br>Unexposed: >70 (35.0%)  | Not reported                      | CAD, Duodenal ulcer, Erosive esophagitis, Gastric ulcer, Tobacco use                                                                                               | Placebo arm participants in trial                                                                                                                            | None                                                                                                                                                                                                                                                                        | 50   |
| Sugano 2011                | Exposed: 69.3 (8.57)<br>Unexposed: 68.7 (8.79)  | Not reported                      | Alcohol use, <i>H. pylori</i> , Ischemic heart disease, Ischemic stroke, Tobacco use                                                                               | Gefarnate arm participants in trial                                                                                                                          | None                                                                                                                                                                                                                                                                        | 51   |
| Sugano 2012                | Exposed: 62.8 (11.7)<br>Unexposed: 63.7 (11.1)  | Not reported                      | RA, osteoarthritis, low back pain                                                                                                                                  | Gefarnate arm participants in trial                                                                                                                          | None                                                                                                                                                                                                                                                                        | 52   |
| van de Garde 2006 (Thorax) | Cases: 80-89 (34.4%)<br>Controls: 70-79 (37.0%) | Diagnostic codes (Read)           | Alcohol abuse, CHF*, CVA*, Pulmonary disease*, Tobacco use                                                                                                         | Matched 1:4 on age ( $\pm 2$ years), gender, General Practitioner practice group, and index date using Diabetic General Practice Research Database enrollees | Vaccinations<br><u>Medications</u> : Statins, current corticosteroids                                                                                                                                                                                                       | 53   |
| van de Garde 2006 (ERJ)    | 67 (0.51)                                       | Diagnostic codes (ICD-9)          | Respiratory diseases, heart failure, DM                                                                                                                            | Matched 1:4 on age and sex using unexposed PHARMO database enrollees                                                                                         | None                                                                                                                                                                                                                                                                        | 54   |

| Author Year               | Age, years                                      | CAP Definition          | Comorbidities                                              | Comparison                                                                                                                                                   | Additional Covariates                                                 | Ref. |
|---------------------------|-------------------------------------------------|-------------------------|------------------------------------------------------------|--------------------------------------------------------------------------------------------------------------------------------------------------------------|-----------------------------------------------------------------------|------|
| van de Garde 2007 (J HTN) | Cases: 80-89 (34.4%)<br>Controls: 70-79 (37.0%) | Diagnostic codes (Read) | Alcohol abuse, CHF*, CVA*, Pulmonary disease*, Tobacco use | Matched 1:4 on age ( $\pm 2$ years), gender, General Practitioner practice group, and index date using Diabetic General Practice Research Database enrollees | Vaccinations<br><u>Medications</u> : Statins, current corticosteroids | 55   |

Age reported as mean (SD) or largest categorical age group (%) unless otherwise noted

\* indicates comorbidities included in effect estimate adjustments

**Abbreviations:** ARB, angiotensin receptor blocker; CAD, coronary artery disease; CAP, community-acquired pneumonia; CHF, congestive heart failure; CKD, chronic kidney disease; COPD, chronic obstructive pulmonary disease; CVA, cerebral vascular attack; DM, diabetes mellitus; FEV1, forced expiratory volume in 1 second; GERD, gastroesophageal reflux disease; H.pylori, Helicobacter pylori; IBD, inflammatory bowel disease; IQR, interquartile range; MI, myocardial infarction; NR, not reported; PVD, peripheral vascular disease; RA, rheumatoid arthritis; Ref, study reference number
