# Supplementary material for: Risk of Community-Acquired Pneumonia with Outpatient Proton-Pump Inhibitor Therapy: A Systematic Review and Meta-Analysis
Source: PubMed Central journal article supplement (PMC4456166; doi:10.1371/journal.pone.0128004), 2015-06-04
Supplement: pone.0128004.s009.pdf [file pone.0128004.s009.pdf]

**S8 Table. Summary of Sensitivity Analyses**

| Description                | # Cases / # Participants | # of Studies | Pooled Effect Estimate | 95% CI    | I <sup>2</sup> (%) | p-value for Heterogeneity | Ref.                                                                    |
|----------------------------|--------------------------|--------------|------------------------|-----------|--------------------|---------------------------|-------------------------------------------------------------------------|
| Adults only*               | 145358 / 6002023         | 21           | 1.36                   | 1.18-1.56 | 94.4               | <0.001                    | 24,25,27,28,31,32,33,36,38,39,40,44,45,46,47,48,49,50,51,52,54          |
| PPI only†                  | 222715 / 6812317         | 24           | 1.48                   | 1.14-1.92 | 99.2               | <0.001                    | 23,24,25,27,28,31,32,33,35,36,37,38,39,40,43,44,46,47,48,49,50,51,52,54 |
| Strict CAP definition‡     | 3733 / 15698             | 7            | 1.22                   | 0.99-1.52 | 65.8               | 0.007                     | 23,25,28,33,35,39,45                                                    |
| Low risk of bias§          | 135030 / 6000720         | 13           | 1.26                   | 1.09-1.45 | 96.3               | <0.001                    | 24,25,27,31,32,33,37,39,45,46,47,48,49                                  |
| Adjusted effect estimate   | 149226 / 6018673         | 15           | 1.33                   | 1.16-1.52 | 95.7               | <0.001                    | 24,25,27,28,31,32,35,36,37,39,45,46,47,48,49                            |
| Observational studies only | 222815 / 6809694         | 22           | 1.49                   | 1.15-1.93 | 99.3               | <0.001                    | 23,24,25,27,28,31,32,33,34,35,36,37,39,40,43,44,45,46,47,48,49,54       |

**Abbreviations:** CI, confidence interval; Ref, study reference number

\* Adults only includes studies with more than 95% participants ≥18 years old

† PPI only includes studies with exposure defined as PPI use not grouped with other gastric acid suppressing drugs

‡ Strict CAP definition includes studies that required radiographic confirmation of CAP as part of their case definition

§ Low Risk of Bias includes studies with low risk of bias as determined by defined as low risk on ≥4 out of 7 criteria for cohort studies and ≥6 out of 8 criteria for case-control studies using the modified Newcastle-Ottawa Scale
